# Supplementary material
Source: Springer Nature journal article supplement (https://www.springermedizin.de/resource/supplementary/12950_2013_362_MOESM3_ESM.pdf/9557662)

|                       |   |   |   |   |   |
|-----------------------|---|---|---|---|---|
| HS                    | - | + | - | - | - |
| LPS                   | - | - | + | + | + |
| Cold Hsp70 probe      | - | - | - | + | - |
| Cold irrelevant probe | - | - | - | - | + |

HSF1

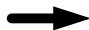

CHBF

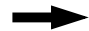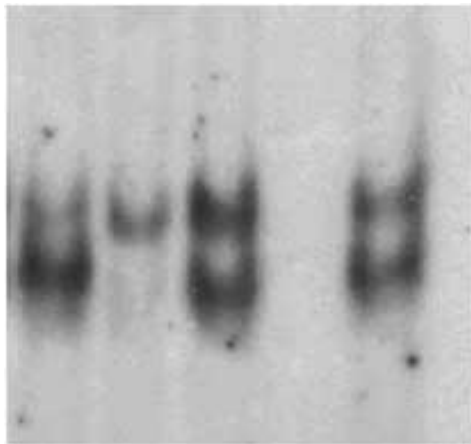

Supplement: MOESM3 [file 9557662]
